# Supplementary material for: miR-205 Expression Promotes Cell Proliferation and Migration of Human Cervical Cancer Cells
Source: PLoS One. 2012 Oct 3;7(10):e46990. doi: 10.1371/journal.pone.0046990 (PMC3463520; doi:10.1371/journal.pone.0046990)
Supplement: Table S1 — Expression of Cluster 1–6 gene transcripts enriched at miR-205 over-expression or depleted at miR-205 suppression. (XLS) [file pone.0046990.s005.xls]

## Sheet: 22425_cluster1_list.txt
Table S1. Expression of Cluster 1-6 gene transcripts enriched at miR-205 over-expression or depleted at miR-205 suppression
Gene	Gene	UniGene	Pre-miR-205*			Anti-miR-205*
description	symbol	ClusterID	1	2		1	2	3
Cluster 1 (62 transcripts)
Proteasome (prosome, macropain) activator subunit 2 (PA28 beta)	PSME2	Hs.434081	-1.19	-0.43		0.62	0.52	0.29
Asparagine synthetase (glutamine-hydrolyzing)	ASNS	Hs.489207	-1	-0.39		0.66	0.48	0.35
Mitochondrial ribosomal protein S17	MRPS17	Hs.44298	-0.97	-0.31		0.63	0.53	0.27
Mitochondrial ribosomal protein S17	MRPS17	Hs.44298	-0.96	-0.32		0.82	0.55	0.29
Proteasome (prosome, macropain) 26S subunit, non-ATPase, 1	PSMD1	Hs.3887	-0.33	-0.2		0.35	0.21	0.26
Tribbles homolog 1 (Drosophila)	TRIB1	Hs.444947	-0.56	-0.48		1.09	0.14	0.05
Replication protein A2, 32kDa	RPA2	Hs.79411	-0.39	-0.3		0.61	0.57	0.31
TBC1 domain family, member 7	TBC1D7	Hs.484678	-0.36	-0.19		0.59	0.56	0.25
Forkhead box M1	FOXM1	Hs.239	-0.37	-0.22		0.63	0.54	0.21
S-phase kinase-associated protein 2 (p45)	SKP2	Hs.23348	-0.24	-0.27		1.13	0.52	0.5
Ring finger protein 181	RNF181	Hs.356187	-0.27	-0.15		1.04	0.55	0.36
Farnesyltransferase, CAAX box, beta	CHURC1	Hs.325531	-0.42	0.05		0.99	0.5	0.33
TIA1 cytotoxic granule-associated RNA binding protein-like 1	TIAL1	Hs.501203; 699166	-0.47	-0.07		1	0.55	0.33
Polymerase (DNA-directed), epsilon 4 (p12 subunit)	POLE4	Hs.469060	-0.57	-0.03		1.13	0.57	0.38
Transcribed locus	ELOVL5	Hs.520189	-0.4	-0.07		0.78	0.38	0.27
Biorientation of chromosomes in cell division 1	BOD1	Hs.425091	-0.55	-0.15		1.27	0.54	0.27
Junction plakoglobin	JUP	Hs.514174	-0.47	-0.09		1.14	0.57	0.17
Mitochondrial ribosomal protein 63	MRP63	Hs.458367	-0.43	-0.28		0.97	0.59	0.29
Eukaryotic translation initiation factor 4E family member 2	EIF4E2	Hs.292026	-0.43	-0.15		1.05	0.51	0.34
G-rich RNA sequence binding factor 1	GRSF1	Hs.309763	-0.45	-0.2		1.09	0.5	0.34
Calmodulin binding transcription activator 1	CAMTA1	Hs.397705	-0.54	-0.22		1.01	0.51	0.33
YTH domain family, member 1	YTHDF1	Hs.11747	-0.63	-0.34		1.27	0.53	0.35
Nucleoporin 37kDa	NUP37	Hs.444276	-0.49	-0.31		1.04	0.37	0.39
SET and MYND domain containing 2	SMYD2	Hs.66170	-0.78	-0.53		1.52	0.49	0.31
Transcribed locus	RPL36AP49	Hs.643554	-0.78	-0.88		2.21	0.62	0.41
OCIA domain containing 2	OCIAD2	Hs.95835	-0.5	-0.58		1.41	0.51	0.36
Tumor necrosis factor, alpha-induced protein 1 (endothelial)	TNFAIP1	Hs.76090	-0.33	-0.53		1.13	0.49	0.3
Ewing sarcoma breakpoint region 1	EWSR1	Hs.374477	-0.3	-0.33		1.12	0.51	0.28
Stomatin (EPB72)-like 2	STOML2	Hs.3439	-0.29	-0.38		1.31	0.44	0.39
PRELI domain containing 1	PRELID1	Hs.279529	-0.22	-0.33		1.16	0.51	0.09
Uridine phosphorylase 1	UPP1	Hs.488240	-0.7	-0.29		1.5	0.52	0.05
Tumor protein p53 binding protein 1	TP53BP1	Hs.440968	-0.68	-0.15		1.5	0.51	0.1
Protein tyrosine phosphatase type IVA, member 2	PTP4A2	Hs.470477	-0.38	-0.06		0.39	0.17	-0.02
ADP-dependent glucokinase	ADPGK	Hs.654636	-0.55	0		0.49	0.38	0.08
YLP motif containing 1	YLPM1	Hs.531111	-0.98	-0.08		0.87	0.52	0.36
Trafficking protein particle complex 2-like	TRAPPC2L	Hs.461722	-0.72	-0.14		0.69	0.56	0.31
Flap structure-specific endonuclease 1	FEN1	Hs.409065	-0.57	-0.14		0.72	0.49	0.25
SUMO1/sentrin/SMT3 specific peptidase 2	SENP2	Hs.401388	-0.56	-0.05		0.8	0.51	0.16
BCL2/adenovirus E1B 19kDa interacting protein 3-like	BNIP3L	Hs.131226	-0.46	-0.01		0.73	0.42	0.2
Kinesin-associated protein 3	KIFAP3	Hs.433442	-0.77	0.02		0.89	0.54	0.34
Ubiquitin carboxyl-terminal esterase L3 (ubiquitin thiolesterase)	UCHL3	Hs.162241	-0.61	-0.01		0.81	0.51	0.36
INO80 complex subunit C	INO80C	Hs.464903	-0.47	0.02		0.65	0.51	0.28
Epithelial cell transforming sequence 2 oncogene	ECT2	Hs.518299	-0.69	0		1.21	0.27	0.3
Transcribed locus	GLRX5	Hs.532683; 700676	-1.25	-0.1		1.79	0.49	0.37
Transcribed locus	HIBCH	Hs.128598; 656685	-1.02	-0.01		1.61	0.51	0.35
Yes-associated protein 1	YAP1	Hs.503692	-1.01	-0.03		1.5	0.51	0.3
Praja ring finger 1	PJA1	Hs.522679	-0.51	-0.04		0.74	0.26	0.17
Heat-responsive protein 12	HRSP12	Hs.18426	-0.8	-0.06		1.12	0.41	0.28
Telomeric repeat binding factor 2, interacting protein	TERF2IP	Hs.301419	-0.75	0.14		1.02	0.42	0.3
ARP3 actin-related protein 3 homolog (yeast)	ACTR3	Hs.433512	-1.04	0.13		1.45	0.54	0.29
Proteasome (prosome, macropain) assembly chaperone 1	PSMG1	Hs.473838	-0.82	0.14		1.08	0.37	0.24
Neuroplastin	NPTN	Hs.187866	-1.32	0.27		1.94	0.56	0.35
Neuroguidin, EIF4E binding protein	NGDN	Hs.9043	-1.48	0.09		1.68	0.54	0.3
Dual specificity phosphatase 14	DUSP14	Hs.91448	-0.98	-0.02		1.11	0.42	0.36
Amphiregulin	AREG	Hs.270833	-1.09	-0.13		1.25	0.45	0.29
NADH dehydrogenase (ubiquinone) 1 alpha subcomplex, 5, 13kDa	NDUFA5	Hs.651219	-0.75	-0.17		1.06	0.26	0.32
Phosducin-like	PDCL	Hs.271749	-0.65	-0.19		0.64	0.12	0.2
P53 and DNA-damage regulated 1	PDRG1	Hs.435755	-0.27	-0.08		0.46	0.03	0.22
Nucleolar and spindle associated protein 1	NUSAP1	Hs.615092	-0.43	0.03		0.7	-0.1	0.27
Ribosome production factor 2 homolog (S. cerevisiae)	RPF2	Hs.372265	-0.78	-0.05		1.01	-0.04	0.3
General transcription factor IIA, 2, 12kDa	GTF2A2	Hs.512934	-0.67	0.11		0.9	0.04	0.16
Density-regulated protein	DENR	Hs.22393	-0.62	0.22		0.74	0.13	0.25
Cluster 2 (48 transcripts)
Von Hippel-Lindau binding protein 1	VBP1	Hs.436803	0.38	0.05		2.27	0.43	0.32
NEDD8 activating enzyme E1 subunit 1	NAE1	Hs.460978	0.3	0.08		2.25	0.43	0.39
Chromosome 5 open reading frame 22	C5orf22	Hs.519246	0.28	-0.02		2.14	0.46	0.36
Ubiquitin-conjugating enzyme E2S pseudogene 2	UBE2SP2	n.a.	0.25	0		2.16	0.5	0.34
Eukaryotic translation initiation factor 3, subunit E	EIF3E	Hs.405590	0.31	0.06		2.19	0.53	0.37
Mitochondrial ribosomal protein S23	MRPS23	Hs.5836	0.27	0.05		2.09	0.52	0.4
5', 3'-nucleotidase, cytosolic	NT5C	Hs.67201	0.21	0.07		2.1	0.45	0.31
Damage-specific DNA binding protein 1, 127kDa	DDB1	Hs.290758	0.18	0.04		2.25	0.54	0.29
High mobility group box 2	HMGB2	Hs.434953	0.15	0.01		2.3	0.5	0.35
TRK-fused gene	TFG	Hs.518123	0.14	0.05		2.25	0.52	0.37
RAB31, member RAS oncogene family	RAB31	Hs.99528	0.19	0.01		2.22	0.62	0.23
Regulation of nuclear pre-mRNA domain containing 1B	RPRD1B	Hs.278839	0.15	-0.23		2.16	0.48	0.35
Polymerase I and transcript release factor	PTRF	Hs.437191	0.09	-0.26		2.15	0.5	0.33
Proteasome (prosome, macropain) 26S subunit, non-ATPase, 2	PSMD2	Hs.518464	0.09	-0.13		2.19	0.58	0.29
Sphingomyelin phosphodiesterase 4, neutral membrane	SMPD4	Hs.516450	0.11	-0.08		2.23	0.58	0.33
PDZ and LIM domain 1	PDLIM1	Hs.368525	0.14	-0.14		2.03	0.49	0.35
Hypothetical LOC151162	LOC151162	Hs.4988	0.09	-0.07		1.8	0.42	0.31
Chemokine-like factor	CKLF	Hs.15159	0.12	-0.06		1.91	0.49	0.36
Ring-box 1, E3 ubiquitin protein ligase	RBX1	Hs.474949	0.16	-0.11		2.19	0.59	0.36
Profilin 2	PFN2	Hs.91747	0.19	-0.07		1.98	0.5	0.35
Glutamyl-prolyl-tRNA synthetase	EPRS	Hs.497788	0.06	-0.15		1.81	0.55	0.36
AXL receptor tyrosine kinase	AXL	Hs.590970	0.14	-0.18		1.68	0.57	0.35
Antizyme inhibitor 1	AZIN1	Hs.459106	0.02	0		1.34	0.47	0.23
Cytochrome b5 type A (microsomal)	CYB5A	Hs.465413	-0.07	0.06		2.01	0.53	0.43
RAB35, member RAS oncogene family	RAB35	Hs.524788	-0.06	0.06		1.85	0.49	0.34
Insulin induced gene 2	INSIG2	Hs.7089	0.08	0.11		1.91	0.56	0.32
Interferon, alpha-inducible protein 27-like 1	IFI27L1	Hs.19414	0.14	0.12		2.18	0.58	0.35
General transcription factor IIIC, polypeptide 6, alpha 35kDa	GTF3C6	Hs.418520	0.14	0.1		2.03	0.52	0.29
Leprecan-like 1	LEPREL1	Hs.374191	0.12	0.03		2.19	0.58	0.36
Ring finger protein 220	RNF220	Hs.456557	0.09	0.09		2.18	0.54	0.34
Potassium channel modulatory factor 1	KCMF1	Hs.654968	0.05	0.1		2.25	0.51	0.37
Dexi homolog (mouse)	DEXI	Hs.592051	0.05	0.11		2.28	0.57	0.38
PHD finger protein 5A	PHF5A	Hs.474980	0.02	0.08		2.13	0.54	0.34
Transmembrane protein 126A	TMEM126A	Hs.533725	0.04	0.06		2.08	0.53	0.39
Voltage-dependent anion channel 2	VDAC2	Hs.355927	0.05	0.04		1.84	0.49	0.37
N-deacetylase/N-sulfotransferase (heparan glucosaminyl) 1	NDST1	Hs.222055	0.01	0.05		2.06	0.58	0.39
Podocalyxin-like	PODXL	Hs.16426	0.01	0.04		1.86	0.52	0.33
Oxysterol binding protein-like 1A	OSBPL1A	Hs.370725	0.01	0.08		1.73	0.52	0.36
Suppressor of Ty 16 homolog (S. cerevisiae)	SUPT16H	Hs.213724	-0.07	-0.02		2.13	0.54	0.36
GABA(A) receptor-associated protein like 1	GABARAPL1	Hs.524250	-0.02	-0.02		1.91	0.48	0.32
RAD51 homolog C (S. cerevisiae)	RAD51C	Hs.412587	0.02	0.03		2.27	0.54	0.39
Sideroflexin 4	SFXN4	Hs.655168	0.02	-0.02		2.25	0.45	0.37
Protein arginine methyltransferase 1	PRMT1	Hs.20521	0.02	-0.01		2.26	0.54	0.36
GIPC PDZ domain containing family, member 1	GIPC1	Hs.655012	0.01	-0.03		2.31	0.52	0.35
Zinc finger, MYM-type 2	ZMYM2	Hs.644041; 695992	0.02	-0.07		2.16	0.5	0.33
Heterogeneous nuclear ribonucleoprotein A0	HNRNPA0	Hs.96996	0.05	-0.07		2.22	0.53	0.42
Hydroxysteroid (17-beta) dehydrogenase 7	HSD17B7	Hs.492925	0.05	0.04		1.63	0.33	0.34
PWP2 periodic tryptophan protein homolog (yeast)	PWP2	Hs.449076	0.14	0.01		1.13	0.23	0.3
Cluster 3 (61 transcripts)
Solute carrier family 25, member 4	SLC25A4	Hs.246506	-0.1	-0.06		2.11	0.41	0.44
Polymerase (DNA-directed), delta 3, accessory subunit	POLD3	Hs.82502	-0.26	-0.2		2.19	0.44	0.41
Translocase of outer mitochondrial membrane 22 homolog (yeast)	TOMM22	Hs.595072	-0.19	-0.23		2.12	0.48	0.34
Polo-like kinase 2	PLK2	Hs.398157	-0.14	-0.14		2.16	0.52	0.42
Chromatin modifying protein 1B	CHMP1B	Hs.656244	-0.14	-0.12		2.29	0.51	0.38
Proteasome (prosome, macropain) 26S subunit, non-ATPase, 7	PSMD7	Hs.440604; 696154	-0.16	-0.13		2.21	0.58	0.3
Zinc finger, MYM-type 2	ZMYM2	Hs.597980; 644041; 695992	-0.18	0.06		1.99	0.49	0.23
Optineurin	OPTN	Hs.332706; 699222	-0.19	-0.08		2.18	0.53	0.34
Inositol 1,3,4-triphosphate 5/6 kinase	ITPK1	Hs.308122	-0.18	-0.04		2.16	0.55	0.31
Discoidin, CUB and LCCL domain containing 2	DCBLD2	Hs.203691	-0.17	-0.01		2.08	0.54	0.39
Metallothionein 1B	MT1B	Hs.656629	-0.22	-0.01		2	0.53	0.35
Cyclin B2	CCNB2	Hs.194698	-0.23	-0.05		2.2	0.58	0.36
Aminopeptidase puromycin sensitive	NPEPPS	Hs.443837	-0.21	-0.06		1.99	0.47	0.34
Cathepsin C	CTSC	Hs.128065	-0.24	-0.01		2.23	0.54	0.38
Chromosome 12 open reading frame 45	C12orf45	Hs.295563	-0.23	-0.03		2.08	0.46	0.34
SEH1-like (S. cerevisiae)	SEH1L	Hs.301048	-0.25	0.01		2.14	0.47	0.35
Heterogeneous nuclear ribonucleoprotein D-like	HNRPDL	Hs.527105	-0.23	0.06		2.05	0.55	0.34
COBW-like placental protein	CBWD5	Hs.635227	-0.25	0		2.06	0.58	0.27
Cold inducible RNA binding protein	CIRBP	Hs.634522	-0.28	-0.09		2.17	0.59	0.32
Proteasome (prosome, macropain) subunit, beta type, 8	PSMB8	Hs.180062	-0.37	-0.06		2.21	0.56	0.35
Neurofilament, heavy polypeptide	NEFH	Hs.198760	-0.1	-0.04		2.05	0.6	0.39
Exportin 5	XPO5	Hs.203206	-0.08	-0.04		1.75	0.53	0.31
Zinc finger protein 212	ZNF212	Hs.490510	-0.2	0.14		1.94	0.6	0.21
Calcyclin binding protein	CACYBP	Hs.508524; 693652; 700635	-0.05	0.04		1.79	0.48	0.24
Family with sequence similarity 108, member C1	FAM108C1	Hs.459072	-0.04	0.08		2.18	0.53	0.34
Calsyntenin 1	CLSTN1	Hs.29665	-0.05	0.1		2.21	0.54	0.33
Crystallin, zeta (quinone reductase)	CRYZ	Hs.83114	-0.04	0.12		2.07	0.51	0.32
Mitogen-activated protein kinase kinase 1	MAP2K1	Hs.145442	-0.05	0.15		2.16	0.51	0.34
Leukotriene A4 hydrolase	LTA4H	Hs.524648	-0.14	0.21		2.2	0.55	0.36
PHD finger protein 10	PHF10	Hs.435933	-0.11	0.22		2.12	0.53	0.36
Stanniocalcin 2	STC2	Hs.233160	-0.1	0.22		2.25	0.55	0.38
Suppression of tumorigenicity 13 pseudogene 4	ST13P4	Hs.511834	-0.1	0.17		2.16	0.53	0.32
Transmembrane protein 51	TMEM51	Hs.465305	-0.05	0.23		2.23	0.56	0.31
Phosphatidylinositol-specific phospholipase C, X domain containing 2	PHLDB2	Hs.477114	-0.07	0.26		1.98	0.47	0.29
Ribosomal protein L26-like 1	RPL26L1	Hs.546390	-0.03	0.24		2.31	0.53	0.38
Chromobox homolog 1	CBX1	Hs.77254	-0.04	0.27		2.22	0.5	0.43
Transmembrane protein 39B	TMEM39B	Hs.25544	-0.02	0.15		1.89	0.48	0.33
Cell division cycle 20 homolog (S. cerevisiae)	CDC20	Hs.524947	-0.03	0.17		2.19	0.58	0.38
Casein kinase 1, alpha 1	CSNK1A1	Hs.529862; 654547; 699188	-0.02	0.15		1.98	0.55	0.38
Kinesin family member 20A	CDC23	Hs.73625	-0.06	0.17		2.03	0.6	0.37
Cysteine-rich with EGF-like domains 2	CRELD2	Hs.211282	-0.13	0.14		1.95	0.55	0.32
NADH dehydrogenase (ubiquinone) 1 alpha subcomplex, 10, 42kDa	NDUFA10	Hs.277677	-0.12	0.17		2.26	0.54	0.25
Influenza virus NS1A binding protein	IVNS1ABP	Hs.497183	-0.09	0.13		2.17	0.45	0.38
Thymine-DNA glycosylase	TDG	Hs.584809	-0.13	0.21		2.32	0.4	0.41
Glyoxalase domain containing 4	GLOD4	Hs.279061	-0.12	0.23		2.14	0.45	0.39
Discoidin domain receptor tyrosine kinase 1	DDR1	Hs.631988	-0.16	0.15		1.88	0.49	0.33
Transcribed locus	IER5	Hs.15725	-0.19	0.17		2.32	0.56	0.4
G protein-coupled receptor, family C, group 5, member A	GPRC5A	Hs.631733	-0.19	0.15		2.19	0.53	0.34
Asparagine-linked glycosylation 5	ALG5	Hs.507769	-0.19	0.13		2.02	0.52	0.33
DDB1 and CUL4 associated factor 13	DCAF13	Hs.532265	-0.23	0.09		2.23	0.52	0.32
DnaJ (Hsp40) homolog, subfamily B, member 9	DNAJB9	Hs.6790	-0.22	0.1		2.17	0.52	0.32
Tumor suppressor candidate 1	TUSC1	Hs.26268	-0.18	0.11		2.17	0.48	0.35
Aprataxin	APTX	Hs.20158	-0.22	0.13		2.19	0.51	0.37
ORM1-like 1 (S. cerevisiae)	ORMDL1	Hs.693651; 653237; 700632	-0.23	0.14		2.21	0.48	0.38
Transformer 2 beta homolog (Drosophila)	TRA2B	Hs.533122	-0.24	0.16		2.15	0.51	0.4
Mitochondrial ribosomal protein L47	MRPL47	Hs.283734	-0.3	0.17		2.23	0.49	0.39
FK506 binding protein 1A, 12kDa	FKBP1A	Hs.471933	-0.28	0.19		2.21	0.53	0.34
SMT3 suppressor of mif two 3 homolog 3 (S. cerevisiae)	SUMO3	Hs.474005	-0.28	0.23		2.26	0.52	0.36
Ubiquitin-conjugating enzyme E2D 3 (UBC4/5 homolog, yeast)	UBE2D3	Hs.518773	-0.31	0.1		2.25	0.54	0.38
Transcribed locus, strongly similar to NP_001859.1	RRAGA	Hs.432330	-0.26	0.1		2.13	0.48	0.41
Translocase of inner mitochondrial membrane 9 homolog (yeast)	TIMM9	Hs.440525	-0.23	0.17		1.92	0.48	0.42
Cluster 4 (65 transcripts)
Metallothionein 1F	MT1F	Hs.513626	-0.28	-0.32		1.44	0.55	0.34
RNA binding motif protein 17	RBM17	Hs.498548	-0.38	-0.28		1.57	0.55	0.35
Polymerase (RNA) II (DNA directed) polypeptide B, 140kDa	POLR2B	Hs.602757	-0.35	-0.19		1.34	0.56	0.32
Alpha- and gamma-adaptin binding protein	AAGAB	Hs.254642	-0.54	-0.19		1.61	0.57	0.32
Metastasis associated 1 family, member 2	MTA2	Hs.173043	-0.49	-0.27		1.66	0.54	0.24
Chromosome 6 open reading frame 115	C6orf115	Hs.238205; 600861	-0.44	-0.24		1.93	0.48	0.4
Dolichyl-phosphate mannosyltransferase polypeptide 1, catalytic subunit	DPM1	Hs.654951	-0.52	-0.27		2.14	0.57	0.29
Aldehyde dehydrogenase 9 family, member A1	ALDH9A1	Hs.2533	-0.47	-0.2		2.11	0.57	0.29
DnaJ (Hsp40) homolog, subfamily C, member 7	DNAJC7	Hs.500156	-0.42	-0.2		1.83	0.54	0.31
Snail homolog 2 (Drosophila)	SNAI2	Hs.360174	-0.38	-0.22		1.81	0.59	0.28
Mitochondrial ribosomal protein S33	MRPS33	Hs.416207	-0.41	-0.29		2.15	0.62	0.32
Zinc finger protein 428	ZNF428	Hs.99093	-0.41	-0.12		2.04	0.55	0.36
RAD51 homolog (RecA homolog, E. coli) (S. cerevisiae)	RAD51	Hs.631709	-0.38	-0.15		1.96	0.52	0.34
Histidine triad nucleotide binding protein 2	HINT2	Hs.70573	-0.41	-0.26		2.24	0.55	0.4
CDV3 homolog (mouse)	CDV3	Hs.518265; 699298	-0.34	-0.23		2.2	0.54	0.35
Cortactin	CTTN	Hs.632133	-0.34	-0.14		2.25	0.49	0.37
Chromosome 7 open reading frame 28B	C7orf28B	Hs.567779	-0.26	-0.13		1.64	0.51	0.35
Secernin 1	SCRN1	Hs.520740	-0.14	-0.08		1.37	0.51	0.32
Cytochrome c, somatic pseudogene 55	CYCSP55	n.a.	-0.27	-0.08		1.34	0.55	0.3
Gamma-glutamylcyclotransferase	GGCT	Hs.530024	-0.51	-0.16		2.2	0.47	0.32
SEC11 homolog C (S. cerevisiae)	SEC11C	Hs.45107	-0.57	-0.2		2.24	0.52	0.35
RAB11A, member RAS oncogene family	RAB11A	Hs.321541	-0.69	-0.09		2.23	0.51	0.34
COP9 constitutive photomorphogenic homolog subunit 5 (Arabidopsis)	COPS5	Hs.491912	-0.63	-0.14		1.87	0.48	0.35
Chromosome 4 open reading frame 27	C4orf27	Hs.406756	-0.62	-0.17		2.23	0.61	0.36
Acylphosphatase 1, erythrocyte (common) type	ACYP1	Hs.18573	-0.53	-0.13		2.09	0.54	0.39
Ring finger protein 114	RNF114	Hs.144949	-0.47	-0.06		1.67	0.49	0.34
Phosphatidylinositol binding clathrin assembly protein	PICALM	Hs.163893	-0.55	-0.06		2	0.6	0.3
Transmembrane protein 41B	TMEM41B	n.a.	-0.49	0.03		1.53	0.48	0.32
Methylenetetrahydrofolate dehydrogenase (NADP+ dependent) 2	MTHFD2	Hs.469030	-0.58	-0.03		1.72	0.45	0.3
Cathepsin C	CTSC	Hs.128065	-0.77	0.04		2.21	0.58	0.33
SNW domain containing 1	SNW1	Hs.546550	-0.66	0.01		2.2	0.55	0.3
UDP-glucose pyrophosphorylase 2	UGP2	Hs.516217	-0.57	0.04		1.88	0.51	0.33
Dual specificity phosphatase 22	DUSP22	Hs.29106	-0.66	0.11		2.23	0.56	0.4
DEAH (Asp-Glu-Ala-His) box polypeptide 32	BCCIP	Hs.370292	-0.34	0.03		1.61	0.51	0.37
Xylosyltransferase II	XYLT2	Hs.463416; 699363	-0.21	0.03		0.97	0.35	0.2
Vacuolar protein sorting 37 homolog C (S. cerevisiae)	VPS37C	Hs.523715	-0.29	0.01		1.48	0.52	0.26
Ewing sarcoma breakpoint region 1	EWSR1	Hs.374477	-0.35	0		1.88	0.56	0.34
Capping protein (actin filament) muscle Z-line, alpha 2	CAPZA2	Hs.446123; 695918	-0.39	0.07		1.75	0.54	0.3
Mitochondrial translational initiation factor 2	MTIF2	Hs.149894	-0.5	0.09		2.14	0.39	0.41
Eukaryotic translation elongation factor 1 gamma	CHCHD3	Hs.444467; 655010	-0.5	0		1.93	0.52	0.34
RAB1A, member RAS oncogene family	RAB1A	Hs.310645	-0.57	0.03		2.18	0.52	0.33
Chromosome 7 open reading frame 55	C7orf55	n.a.	-0.48	-0.01		2.18	0.52	0.34
Ubiquitin-conjugating enzyme E2T (putative)	UBE2T	Hs.5199	-0.47	0.06		2.17	0.55	0.32
DEAD (Asp-Glu-Ala-Asp) box polypeptide 47	DDX47	Hs.504828	-0.56	0.12		2.21	0.57	0.39
Calcyclin binding protein	MRPS14	Hs.508524; 656182; 699369	-0.5	0.09		1.91	0.53	0.33
Chromosome 9 open reading frame 78	C9orf78	Hs.278429	-0.49	0.06		2	0.55	0.34
Bladder cancer associated protein	BLCAP	Hs.472651	-0.45	0.03		2.06	0.56	0.37
Actin related protein 2/3 complex, subunit 5-like	ARPC5L	Hs.132499	-0.43	0.07		1.95	0.49	0.37
Zinc finger, AN1-type domain 3	ZFAND3	Hs.36959	-0.39	0.09		1.78	0.48	0.36
BAI1-associated protein 2-like 1	BAIAP2L1	Hs.656063	-0.56	0.16		2.29	0.5	0.39
Ubiquitin-conjugating enzyme E2, J2	UBE2J2	Hs.191987	-0.56	0.15		2.31	0.51	0.34
Methyltransferase like 5	METTL5	Hs.470553	-0.59	0.13		2.2	0.54	0.33
FK506 binding protein 9, 63 kDa	FKBP9	Hs.575466; 103934	-0.47	0.1		1.77	0.48	0.23
Proteasome (prosome, macropain) 26S subunit, non-ATPase, 13	PSMD13	Hs.134688	-0.53	0.14		2.32	0.61	0.28
Coiled-coil domain containing 90A	CCDC90A	Hs.214043	-0.46	0.16		2.21	0.6	0.4
DnaJ (Hsp40) homolog, subfamily B, member 3 pseudogene	DNAJB3	Hs.124112	-0.46	0.13		2.14	0.56	0.33
FGFR1OP N-terminal like	FOPNL	Hs.514179	-0.34	0.14		1.8	0.5	0.26
Kinesin light chain 1	KLC1	Hs.20107	-0.37	0.16		2.11	0.53	0.3
Embryonic ectoderm development	EED	Hs.503510	-0.41	0.18		2.28	0.57	0.35
SET domain containing 3	SETD3	Hs.510407	-0.33	0.14		1.97	0.5	0.33
Transcribed locus	LOC389137	Hs.380752	-0.38	0.03		2.17	0.51	0.35
Phosphatidylinositol glycan anchor biosynthesis, class C	PIGC	Hs.188456	-0.36	0.09		2.27	0.57	0.33
PWP1 homolog (S. cerevisiae)	PWP1	Hs.506652	-0.36	0.11		2.19	0.48	0.35
Presenilin associated, rhomboid-like	PARL	Hs.478469	-0.32	0.07		2.33	0.51	0.28
Chromosome 3 open reading frame 31	C3orf31	Hs.475472	-0.42	0.04		2.21	0.3	0.3
Cluster 5 (16 transcripts)
Mitochondrial translational initiation factor 2	MTIF2	Hs.149894	-0.94	-0.18		1.63	0.43	0.31
LSM6 homolog, U6 small nuclear RNA associated (S. cerevisiae)	LSM6	Hs.190520	-0.95	-0.13		1.91	0.51	0.28
Septin 2	SEPT2	Hs.335057	-0.75	-0.14		1.51	0.52	0.29
Hypothetical LOC388789	LOC388789	Hs.349092	-0.97	-0.26		2.31	0.5	0.31
Aurora kinase A	AURKA	Hs.250822	-0.95	0.03		2.13	0.59	0.27
Epithelial cell adhesion molecule	EPCAM	Hs.542050; 645285; 699160	-1.12	0.05		2.28	0.58	0.38
Transcription elongation factor A (SII)-like 4	TCEAL4	Hs.194329	-1.07	0.03		2.23	0.54	0.39
Annexin A3	ANXA3	Hs.480042	-0.98	0.03		2.16	0.48	0.38
Phosphoribosyl pyrophosphate synthetase 1	PRPS1	Hs.56	-0.71	0.11		1.81	0.48	0.37
Transcribed locus	C5orf15	Hs.355177	-0.71	0.06		1.57	0.44	0.38
GAR1 ribonucleoprotein homolog (yeast)	GAR1	Hs.69851	-0.56	0.06		1.37	0.44	0.35
COBW domain containing 1	CBWD1	Hs.531330	-0.6	0.11		1.51	0.52	0.29
Chromosome 6 open reading frame 35	C6orf35	n.a.	-0.63	-0.03		1.28	0.43	0.33
Proteasome (prosome, macropain) assembly chaperone 4	PSMG4	n.a.	-0.42	0.02		0.72	0.26	0.13
Lysophospholipase II	LYPLA2	Hs.533479	-0.93	0.13		1.68	0.53	0.15
A kinase (PRKA) anchor protein (yotiao) 9	AKAP9	Hs.651221	-0.56	0.17		0.95	0.33	0.03
Cluster 6 (18 transcripts)
Keratin 16	KRT16	Hs.655160	-0.2	-0.59		0.35	0.59	0.22
Chromosome 11 open reading frame 31	C11orf31	Hs.655373	-0.7	-0.51		0.18	0.52	0.29
UBX domain protein 1	UBXN1	Hs.351296	-0.45	-0.39		0.18	0.54	0.14
Cytokine receptor-like factor 3	CRLF3	Hs.370168	-0.38	-0.69		0.19	0.43	-0.03
Angio-associated, migratory cell protein	AAMP	Hs.83347	-0.81	-1		0.62	0.34	0.21
UDP-GlcNAc:betaGal beta-1,3-N-acetylglucosaminyltransferase 1	B3GNT1	Hs.8526	-0.29	-0.92		0.56	0	0.05
ATPase, class II, type 9A	ATP9A	Hs.592144; 649234; 700629	0.07	-0.53		0.34	0.25	-0.12
Connective tissue growth factor	CTGF	Hs.591346	0.44	-2.32		2.13	0.54	0.34
Cysteine-rich, angiogenic inducer, 61	CYR61	Hs.8867	-0.08	-1.42		1.97	0.54	0.33
Activating transcription factor 3	ATF3	Hs.460	-0.11	-1.01		1.88	0.55	0.45
Ribosomal protein S19 binding protein 1	RPS19BP1	Hs.526933	-0.1	-0.31		0.53	0.16	0.15
Chromatin modifying protein 2A	CHMP2A	Hs.12107	0.03	-0.42		0.46	0.54	0.15
Chromosome 7 open reading frame 40	C7orf40	Hs.25892	0.05	-0.3		0.36	0.45	0.22
Acid phosphatase 6, lysophosphatidic	ACP6	Hs.562154	0.12	-0.29		0.41	0.42	0.21
Mevalonate kinase	MVK	Hs.130607	0.17	-0.31		0.33	0.46	0.22
Atlastin GTPase 3	ATL3	Hs.356719	-0.01	-0.15		0.23	0.19	0.22
Transmembrane protein 2	TMEM2	Hs.494146	-0.05	-0.07		0.24	0.21	0.2
Paraneoplastic antigen MA1	PNMA1	Hs.194709	-0.04	-0.11		0.2	0.3	0.32
n.a.=not available; * Values refer to expression ratios of Ago2-bound RNAs from Anti-miR-205 or Pre-miR-205 versus mock transfected cells.
