# Supplementary material for: miR-205 Expression Promotes Cell Proliferation and Migration of Human Cervical Cancer Cells
Source: PLoS One. 2012 Oct 3;7(10):e46990. doi: 10.1371/journal.pone.0046990 (PMC3463520; doi:10.1371/journal.pone.0046990)
Supplement: Table S2 — Functional annotations of miR-205 targets from CLIP-Chip using GENECODIS 2.0. (XLS) [file pone.0046990.s006.xls]

## Sheet: genecodisresults.txt
Table S2. Functional annotations of miR-205 targets from CLIP-Chip using GENECODIS 2.0
Annotations (GO accession no.)		NG	NGR	Hyp	Hyp_c
Genes in category		(of 252)	(of 30,642)	P-value	P-value
Mitotic cell cycle (GO:0000278)		17	308	<0.001	<0.001
CCNB2, POLD3, NUP37, CDC20, SKP2, PSMD2, PSME2, PSMD7, AKAP9, PLK2, PSMD1, PSMD13,
RPA2, CDC23, AURKA, SEH1L, FEN1
Viral reproduction (GO:0016032)		13	327	<0.001	<0.001
NUP37, RPL26L1, SUPT16H, RBX1, GTF2A2, POLR2B, PSMD2, PSME2, PSMD7, SLC25A4,
PSMD1, PSMD13, SEH1L
Cell division (GO:0051301)		11	261	<0.001	<0.001
NUSAP1, CCNB2, NUP37, CHMP1B, CDC20, BOD1, CSNK1A1, CDC23, AURKA, SEH1L, SEPT2
DNA repair (GO:0006281)		14	263	<0.001	<0.001
POLD3, SUPT16H, DDB1, RBX1, POLR2B, UBE2T, BCCIP, UBE2D3, TP53BP1, RAD51, TDG,
RPA2, FEN1, RAD51C
S phase of mitotic cell cycle (GO:0000084)		9	111	<0.001	<0.001
POLD3, SKP2, PSMD2, PSME2, PSMD7, PSMD1, PSMD13, RPA2, FEN1
Anaphase-promoting complex-dependent proteasomal ubiquitin-dependent protein catabolic process (GO:0031145)		9	80	<0.001	<0.001
CDC20, SKP2, PSMD2, PSME2, PSMD7, PSMD1, PSMD13, CDC23, AURKA
Regulation of ubiquitin-protein ligase activity involved in mitotic cell cycle (GO:0051439)		7	75	<0.001	<0.001
CDC20, PSMD2, PSME2, PSMD7, PSMD1, PSMD13, CDC23
Cell cycle checkpoint (GO:0000075)		10	129	<0.001	<0.001
CCNB2, DDB1, CDC20, PSMD2, PSME2, PSMD7, PSMD1, PSMD13, RPA2, CDC23
Negative regulation of ubiquitin-protein ligase activity involved in mitotic cell cycle (GO:0051436)		7	65	<0.001	<0.001
CDC20, PSMD2, PSME2, PSMD7, PSMD1, PSMD13, CDC23
Positive regulation of ubiquitin-protein ligase activity involved in mitotic cell cycle (GO:0051437)		7	71	<0.001	<0.001
CDC20, PSMD2, PSME2, PSMD7, PSMD1, PSMD13, CDC23
Regulation of cellular amino acid metabolic process (GO:0006521)		6	51	<0.001	<0.001
PSMD2, PSME2, PSMD7, PSMD1, PSMD13, AZIN1
Apoptosis (GO:0006915)		15	576	<0.001	0.00373281
BLCAP, HMGB2, HINT2, ECT2, DUSP22, PSMD2, TNFAIP1, PNMA1, UBE2D3, PSME2, PSMD7,
RRAGA, PSMD1, TIAL1, PSMD13
Proteasomal ubiquitin-dependent protein catabolic process (GO:0043161)		5	43	<0.001	0.00157732
DDB1, RBX1, TNFAIP1, UBE2D3, UBXN1
Cell cycle (GO:0007049)		13	402	<0.001	0.0017489
NUSAP1, BLCAP, RAB11A, CHMP1B, CDC20, BOD1, BCCIP, CSNK1A1, NAE1, CDC23,
AURKA, FOXM1, SEPT2
Cellular nitrogen compound metabolic process (GO:0034641)		9	195	<0.001	0.00184815
ASNS, PSMD2, PSME2, ALDH9A1, PSMD7, PSMD1, PSMD13, AZIN1, HIBCH
Translation (GO:0006412)		10	249	<0.001	0.00209401
RPL26L1, EIF4E2, COPS5, EIF3E, MTIF2, MRPS33, MRP63, MRPL47, MRPS23, MRPS14
M/G1 transition of mitotic cell cycle (GO:0000216)		6	79	<0.001	0.00215215
PSMD2, PSME2, PSMD7, PSMD1, PSMD13, RPA2
Double-strand break repair (GO:0006302)		5	52	<0.001	0.00283041
APTX, TP53BP1, RAD51, RPA2, FEN1
Protein transport (GO:0015031)		12	402	<0.001	0.00484522
AAGAB, TIMM9, NUP37, SENP2, VPS37C, CHMP1B, RAB31, RAB35, C3orf31, CHMP2A, RAB1A, SEH1L
G1/S transition of mitotic cell cycle (GO:0000082)		7	135	<0.001	0.0048984
SKP2, PSMD2, PSME2, PSMD7, PSMD1, PSMD13, RPA2
DNA damage response, signal transduction by p53 class mediator resulting in cell cycle arrest (GO:0006977)		5	61	<0.001	0.00493876
PSMD2, PSME2, PSMD7, PSMD1, PSMD13
Atrioventricular valve morphogenesis (GO:0003181)		2	3	<0.001	0.00641388
JUP, CYR61
Regulation of protein stability (GO:0031647)		3	18	<0.001	0.011973
APTX, GIPC1, AURKA
Histone H3-K36 methylation (GO:0010452)		2	4	<0.001	0.0122033
SMYD2, SETD3
mRNA metabolic process (GO:0016071)		6	120	<0.001	0.0136821
LSM6, PSMD2, PSME2, PSMD7, PSMD1, PSMD13
Regulation of double-strand break repair via homologous recombination (GO:0010569)		2	5	<0.001	0.0166162
TERF2IP, RPA2
Peptidyl-lysine dimethylation (GO:0018027)		2	5	<0.001	0.0166162
SMYD2, SETD3
DNA recombinase assembly (GO:0000730)		2	5	<0.001	0.0166162
RAD51, RPA2
Telomere maintenance via semi-conservative replication (GO:0032201)		3	22	<0.001	0.0170737
POLD3, RPA2, FEN1
Telomere maintenance (GO:0000723)		4	49	<0.001	0.0171312
TERF2IP, POLD3, RPA2, FEN1
Mitosis (GO:0007067)		7	179	<0.001	0.0171449
CCNB2, BOD1, CSNK1A1, CDC23, AURKA, MAP2K1, SEPT2
Endosome transport (GO:0016197)		4	51	<0.001	0.0180776
VPS37C, RAB35, CHMP2A, PICALM
Telomere maintenance via recombination (GO:0000722)		3	23	<0.001	0.0183332
POLD3, RPA2, FEN1
Peptidyl-lysine monomethylation (GO:0018026)		2	6	<0.001	0.0204145
SMYD2, SETD3
Protein K11-linked ubiquitination (GO:0070979)		3	25	0.00110575	0.0221782
UBE2T, UBE2D3, CDC23
Regulation of cell growth (GO:0001558)		3	59	0.013	0.022
CTGF, CYR61, FOXM1
Cell proliferation (GO:0008283)		7	300	0.013	0.023
SKP2, KRT16, DUSP22, CDV3, YAP1, CYR61, CKLF
DNA replication (GO:0006260)		6	147	0.0014034	0.0252613
SUPT16H, TNFAIP1, NAE1, CTGF, RPA2, FEN1
Secretion by cell (GO:0032940)		2	7	0.00137672	0.0254331
AXL, CKLF
Negative regulation of proteasomal ubiquitin-dependent protein catabolic process (GO:0032435)		2	7	0.00137672	0.0254331
GIPC1, UBXN1
Protein neddylation (GO:0045116)		2	7	0.00137672	0.0254331
RBX1, NAE1
Protein ubiquitinylation (GO:0016567)		6	149	0.00150355	0.0263874
RBX1, RNF220, TNFAIP1, UBE2D3, DCAF13, CDC23
Negative regulation of survival gene product expression (GO:0008634)		2	8	0.00182567	0.0305148
BNIP3L, SKP2
Regulation of protein catabolic process (GO:0042176)		2	8	0.00182567	0.0305148
PSMD2, PSMD1
RNA metabolic process (GO:0016070)		6	157	0.00195953	0.0319904
LSM6, PSMD2, PSME2, PSMD7, PSMD1, PSMD13
DNA strand elongation involved in DNA replication (GO:0006271)		3	31	0.00208392	0.0332479
POLD3, RPA2, FEN1
Base-excision repair (GO:0006284)		3	32	0.00228563	0.0356558
POLD3, TDG, FEN1
Nucleotide-excision repair (GO:0006289)		4	68	0.00240841	0.0367544
POLD3, DDB1, POLR2B, RPA2
Cholesterol biosynthetic process (GO:0006695)		3	33	0.00249904	0.0373261
MVK, HSD17B7, INSIG2
Positive regulation of cell migration (GO:0030335)		3	81	0.03	0.045
PODXL, CYR61, MAP2K1
Cell migration (GO:0016477)		4	73	0.0031177	0.0455964
JUP, TNFAIP1, CTGF, PODXL
Protein folding (GO:0006457)		6	174	0.00326806	0.0468199
DNAJB9, VBP1, FKBP1A, FKBP9, PDRG1, DNAJC7
Response to fatty acid (GO:0070542)		2	11	0.00352821	0.0476308
CTGF, INSIG2
Morphogenesis of embryonic epithelium (GO:0016331)		2	11	0.00352821	0.0476308
JUP, GRSF1
Mitotic metaphase plate congression (GO:0007080)		2	11	0.00352821	0.0476308
CDC23, SEH1L
NG = number of annotated genes in the input list (out of the total 252 genes in the input list);
NGR = number of annotated genes in the reference list (out of the total 30642 genes in the reference list);
Hyp = Hypergeometric P-value; Hyp_c = Corrected hypergeometric P-value
